1 **Modeling the frequency and number of persons to test to detect and control COVID-19 outbreaks in**  
2 **congregate settings**

3 Prabasaj Paul<sup>1\*</sup>, Emily Mosites<sup>1</sup>, Rebecca L. Laws<sup>1</sup>, Heather Scobie<sup>1</sup>, Rachel B. Slayton<sup>1\*\*</sup>, Kristie E. N.  
4 Clarke<sup>1\*\*</sup>

5 **Affiliation (all authors):**

6 <sup>1</sup>COVID-19 Response, Centers for Disease Control and Prevention, Atlanta GA

7

8 \*Corresponding author

9 1600 Clifton Rd NE

10 MS H16-2

11 Centers for Disease Control and Prevention

12 Atlanta GA 30329

13 404-718-5287

14 [VIG5@cdc.gov](mailto:VIG5@cdc.gov)

15 \*\* These senior authors contributed equally to this article.

16

17 ***Disclaimer:*** *The findings and conclusions in this report are those of the authors and do not necessarily*  
18 *represent the official position of the Centers for Disease Control and Prevention.*

19

20 **Modeling the frequency and number of persons to test to detect and control COVID-19 outbreaks in**  
21 **congregate settings**

22 **Abstract (238 words)**

23 **Background:** Congregate settings are at risk for coronavirus disease 2019 (COVID-19) outbreaks.

24 Diagnostic testing can be used as a tool in these settings to identify outbreaks and to control  
25 transmission.

26 **Methods:** We used transmission modeling to estimate the minimum number of persons to test and the  
27 optimal frequency to detect small outbreaks of COVID-19 in a congregate facility. We also estimated the  
28 frequency of testing needed to interrupt transmission within a facility.

29 **Results:** The number of people to test and frequency of testing needed depended on turnaround time,  
30 facility size, and test characteristics. Parameters are calculated for a variety of scenarios. In a facility of  
31 100 people, 26 randomly selected individuals would need to be tested at least every 6 days to identify a  
32 true underlying prevalence of at least 5%, with test sensitivity of 85%, and greater than 95% outbreak  
33 detection sensitivity. Disease transmission could be interrupted with universal, facility-wide testing with  
34 rapid turnaround every three days.

35 **Conclusions:** Testing a subset of individuals in congregate settings can improve early detection of small  
36 outbreaks of COVID-19. Frequent universal diagnostic testing can be used to interrupt transmission  
37 within a facility, but its efficacy is reliant on rapid turnaround of results for isolation of infected  
38 individuals.

39

## 40 **Background**

41 SARS-CoV-2, the virus that causes coronavirus disease 2019 (COVID-19), is a highly transmissible  
42 pathogen that spreads easily in shared environments (1). Thus, congregate settings, such as long-term  
43 care facilities, correctional facilities, homeless shelters, and high-density workplaces, are at increased  
44 risk for outbreaks of COVID-19 (2-9). Diagnostic testing to detect SARS-CoV-2 infection in congregate  
45 settings may achieve at least two key public health objectives: 1) testing can identify outbreaks,  
46 triggering the application of intervention measures and further testing, and 2) testing can identify  
47 infectious individuals who need to isolate to prevent further transmission.

48 We developed and applied models related to SARS-CoV-2 infectiousness, test sensitivity and  
49 specificity, and time to test results to estimate both the number of people and frequency of testing  
50 needed in congregate settings to achieve: 1) early detection of outbreaks and 2) transmission  
51 interruption. These estimates can inform testing strategies designed to protect people living or working  
52 in congregate settings and the communities in which they reside.

53

## 54 **Materials and Methods**

### 55 *Testing for early detection of outbreaks*

56 Outbreak detection was defined as identifying at least one positive test, regardless of true  
57 underlying prevalence. We defined “early” detection to mean identifying at least one positive result  
58 before case counts surpass a set number; here we chose 2, 5, and 10 true cases. For this purpose, the  
59 number of people that need to be tested in a congregate setting is dependent on the true underlying  
60 prevalence of infection, and the sensitivity and the specificity of the test. We estimated the number of  
61 randomly-selected individuals ( $n$ ) needed to test for detection of an outbreak based on an expected  
62 number of infections ( $n_0$ , commensurate with prevalence  $p$ ), a minimum detection sensitivity  $S$ , and a

63 minimum positive predictive value. When the  $n$  required exceeded the facility size  $N$ , then the outbreak  
64 was considered too small to be detected.

65 If  $n$  individuals are randomly selected for testing (test sensitivity  $\epsilon$ , specificity  $\pi$ ) from a facility of  
66 size  $N$  where the prevalence of infections is  $p$ , and presence of an outbreak is indicated by at least one  
67 positive test result, the probabilities of four possible outcomes are:

- 68 • Detection of outbreak and an outbreak exists (true positive):  $TP = 1 - (FP + FN + TN)$
- 69 • Detection of an outbreak but no outbreak exists (false positive):  $FP = (1 - p)^N(1 - \pi^n)$
- 70 • No detection of an outbreak but outbreak exists (false negative):  $FN = [p(1 - \epsilon) + (1 - p)\pi]^n$
- 71  $-TN$
- 72 • No detection of an outbreak and no outbreak exists (true negative):  $TN = (1 - p)^N\pi^n$

73 For the facility level, outbreak detection sensitivity is  $S = TP/(TP + FN)$  and positive predictive value is  
74  $PPV = TP/(TP + FP)$ .

75 The true underlying prevalence of infection,  $n$ , was determined by the rate of introduction, ( $\eta =$   
76 community incidence  $\times$  facility size) and the doubling time ( $\tau$ ) within the facility as:

$$77 \quad \frac{dn}{dt} = (\ln 2)n/\tau + \eta$$

78 Solving for the expected number of infections at time  $t$  after first introduction (i.e., with  $n(0)=1$ ) gives:

$$79 \quad e^{t \ln 2/\tau} + (\eta\tau/\ln 2) (e^{t \ln 2/\tau} - 1).$$

80 At a facility where the rate of introduction is  $\eta$  and the doubling time is  $\tau$ , the expected number of  
81 infections at time  $t$  after first introduction is:

$$82 \quad e^{t \ln 2/\tau} + (\eta\tau/\ln 2) (e^{t \ln 2/\tau} - 1).$$

83 We assumed a community incidence of 100 cases per 100,000 people and doubling time for congregate  
84 settings of 3.4 days (4). Expressions were calculated using R software v3.6.2.

85 *Testing to interrupt transmission*

86 To interrupt transmission (i.e., achieve a basic reproduction number below one), a successful  
87 testing strategy may need to achieve at least 60% reduction in transmission (10). We estimated the  
88 percent reduction in transmission for two scenarios of facility-wide testing: 1) both test-positive and  
89 symptomatic individuals are isolated, and 2) only test-positive individuals are isolated (appropriate in  
90 settings where symptom ascertainment is difficult). Expressions were also calculated using R 3.6.2.

91 We used the infectivity profile of COVID-19 estimated by He *et al.* (11). We also used an  
92 assumption that presymptomatic infections account for 50% of transmission and 40% of infections are  
93 asymptomatic (12). In our model, test sensitivity ranged 85%–95%, depending on both the test type and  
94 time since exposure (i.e., more sensitive during times of high viral load) (13).

95 If the infectiousness of an infected individual is  $I(t)$  (normalized to unity), where  $t$  is the time  
96 since exposure, and the fraction of infected individuals who have already shown symptoms at  $t$  is  $\sigma(t)$ ,  
97 then the proportion of transmissions eliminated on isolation of symptomatic individuals,  $P_s$ , is:

$$98 \quad P_s = \int_0^{\infty} \sigma(t) I(t) dt.$$

99 If testing is repeated on the same individual at regular intervals  $T$ , then the mean proportion of  
100 asymptomatic transmissions eliminated is:

$$101 \quad P_a(T, t_l) = \frac{1}{T} \int_0^T \sum_{n=0}^{\infty} \rho_a(t + nT, t_l) \prod_{k=0}^n [1 - s(t + kT - T)] dt.$$

102 If an asymptomatic infected individual is tested at time  $t_0$  after infection, with test sensitivity  $s(t_0)$ , and  
103 the test result is available after a reporting lag  $t_l$  at  $t_1 = t_0 + t_l$ , the additional proportion of  
104 transmissions eliminated,  $\rho_a$ , is:

$$105 \quad \rho_a(t_0, t_l) = s(t_0) \int_{t_1}^{\infty} [1 - \sigma(t)] I(t) dt.$$

106 If testing is repeated on the same individual at regular intervals  $T$ , then the mean proportion of  
107 asymptomatic transmissions eliminated is:

108 
$$P_a(T, t_l) = \frac{1}{T} \int_0^T \sum_{n=0}^{\infty} \rho_a(t + nT, t_l) \prod_{k=0}^n [1 - s(t + kT - T)] dt.$$

109 The sum accounts for those who tested true positive when first tested, as well as those who tested false  
 110 negative once, twice, etc. followed by a true positive.

111

112 **Results**

113 *Testing for early detection of outbreaks*

114 We estimated the number of individuals needed to test for early outbreak identification for 18  
 115 scenarios (Table 1), which required testing between 16% and 90% of individuals, depending on facility  
 116 size and true cluster size. For a facility of 100 people, 47 individuals would need to be tested to identify  
 117 at least one positive result if there were truly 5 cases (5% prevalence) with test sensitivity of 85%, and  
 118 greater than 95% outbreak detection sensitivity.

119 **Table 1: Number of individuals needed to test to detect at least one positive result at facilities of**  
 120 **varying sizes given different numbers of cases present (test sensitivity 85%, detection sensitivity  $\geq$**   
 121 **95%)**

| Facility Size | Number of cases at facility          |         |          |
|---------------|--------------------------------------|---------|----------|
|               | 2 cases                              | 5 cases | 10 cases |
|               | Number of individuals needed to test |         |          |
| 30            | 27                                   | 17      | 9        |
| 50            | 42                                   | 27      | 15       |
| 100           | 69*                                  | 47      | 28       |
| 150           | 86*                                  | 61      | 38       |
| 300           | 110*                                 | 87      | 61       |
| 500           | 123*                                 | 104     | 80       |

122 \*Positive predictive value  $\leq$  90%

123 The frequency of testing for detection at a facility should not exceed the time from first  
 124 introduction of an infected person from the community to the maximum threshold of allowable  
 125 infections,  $n_0$ . At a 100-person facility located in a community with an incidence of 100 infections per

126 100,000 daily, an introduction from the community can be expected to occur on average every 10 days,  
127 and a 5% prevalence would be attained 6 days after introduction (Table 2). Therefore, the interval  
128 between tests should not exceed 6 days to detect an outbreak at 5% prevalence or lower.

129 **Table 2: Average number of days—from first introduction of an infected individual from the**  
130 **community—to reach a given number of infections at facilities of varying sizes**

| Facility Size* | Average number of days between introductions** | Days until x number of cases reached |         |          |
|----------------|------------------------------------------------|--------------------------------------|---------|----------|
|                |                                                | 2 cases                              | 5 cases | 10 cases |
| 30             | 33 days                                        | 3 days                               | 7 days  | 11 days  |
| 50             | 20 days                                        | 3 days                               | 7 days  | 10 days  |
| 100            | 10 days                                        | 3 days                               | 6 days  | 10 days  |
| 150            | 7 days                                         | 2 days                               | 6 days  | 9 days   |
| 300            | 3 days                                         | 2 days                               | 5 days  | 8 days   |
| 500            | 2 days                                         | 1 day                                | 4 days  | 6 days   |

131 \*Doubling time is 3.4 days within the facility regardless of size.

132 \*\*If true community incidence is 100 infections daily per 100,000, this is the average number of days in  
133 between introduction of infected individuals to the facility, given the facility size.

134

#### 135 *Testing to interrupt transmission*

136 With no testing, isolation of symptomatic individuals at symptom onset alone would achieve a  
137 33% reduction in transmission (Figure 1A). When symptom-based isolation and testing with immediate  
138 results (within 15 minutes) were combined, a 60% reduction in transmission (i.e.,  $R_0 < 1$ ) (1) would be  
139 achieved if tests were administered at least every 3 days. A 60% reduction in transmission would also be  
140 achieved by administering tests every 2 days if there was a 24-hour delay in results reporting, and by  
141 administering tests daily with a 36-hour delay in results.

142 Using testing alone without additional isolation of symptomatic individuals (Figure 1B) would  
143 require more frequent testing to achieve a 60% reduction in transmission. Daily testing would be  
144 required if results were available in 24 hours and testing every 2 days required if there was a 12-hour  
145 delay in test results.

146 **Figure 1. (A) Scenario 1, Reduction in transmission (%) through isolation of test-positive and**  
147 **symptomatic individuals. (B) Scenario 2, Reduction in transmission (%) through isolation of test-**  
148 **positive individuals only.**

149

## 150 **Discussion**

151 Numerous COVID-19 outbreaks have occurred in congregate settings, sometimes with high  
152 morbidity and mortality (2-9). In this modeling study, we found that early identification of an outbreak  
153 of 5 cases in a facility could be achieved by testing from 21% to 57% of individuals, depending on facility  
154 size. Minimal testing intervals were estimated (e.g., every 6 days for a 100 person facility), but more  
155 frequent testing would increase the likelihood of early detection. Testing frequency should take into  
156 account facility size. Detection of cases among a sample of the facility population would indicate a need  
157 for facility-wide testing and other intervention measures to interrupt transmission.

158 Using testing as a tool to interrupt transmission required a much higher frequency of testing,  
159 generally every 3 days or fewer, particularly if there are reporting lags in receiving test results (i.e., 1–3  
160 days vs. 15 minutes). Findings regarding testing frequency align with another recent modeling study  
161 focused on institutes of higher education (14). Ultimately, the frequency of testing at a facility will  
162 depend on the balance between risk tolerance, frequency of introducing infections, and resource  
163 availability.

164 One limitation of this analysis is that we applied general formulas that did not account for  
165 specific characteristics of individuals residing in and working in these congregate settings. Furthermore,  
166 uncertainties in the modeling parameters introduce imprecision in derived estimates. These values can  
167 provide starting points for consideration for testing strategies but should not be considered definitive.  
168 As additional data become available, parameter estimates can be refined and models can be fitted to  
169 the best available data.



170           To reduce transmission, testing should always be used in combination with other prevention  
171 measures including social distancing, wearing masks and cloth face coverings, hand hygiene, cleaning  
172 and disinfection, screening, and isolation of individuals that are symptomatic or test positive, and  
173 quarantine of their close contacts. In coordination with these measures, testing strategies may reduce  
174 morbidity and mortality among individuals in congregate settings, prevent further spread into the  
175 community, and decrease strain on healthcare systems.

176

### 177 **Acknowledgments**

178 The authors would like to thank Dr. Eric Mooring for his thoughtful review of the manuscript.

179

### 180 **References**

- 181 1. Sanche S, Lin Y, Xu C, Romero-Severson E, Hengartner N, Ke R. High Contagiousness and Rapid  
182 Spread of Severe Acute Respiratory Syndrome Coronavirus 2. *Emerg Infect Dis.* 2020;26(7):1470-  
183 1477.
- 184 2. McMichael TM, Clark S, Pogojans S, Kay M, Lewis J, Baer A. COVID-19 in a Long-Term Care Facility  
185 — King County, Washington, February 27–March 9, 2020. *MMWR Morb Mortal Wkly Rep.* 2020 Mar  
186 27;69(12):339–342.
- 187 3. Kimball A, Hatfield KM, Arons M, James A, Taylor J, Spicer K, et al. Asymptomatic and  
188 Presymptomatic SARS-CoV-2 Infections in Residents of a Long-Term Care Skilled Nursing Facility —  
189 King County, Washington, March 2020. *MMWR Morb Mortal Wkly Rep.* 2020 Apr 3;69(13):377–381.
- 190 4. Arons MM, Hatfield KM, Reddy SC, Kimball A, James A, Jacobs JR, et al. Presymptomatic SARS-CoV-2  
191 Infections and Transmission in a Skilled Nursing Facility. *N Engl J Med.* 2020 May 28;  
192 382(22):2081–2090.

- 193 5. Mosites E, Parker EM, Clarke KEN, Gaeta JM, Baggett TP, Imbert E, et al. Assessment of SARS-CoV-2  
194 Infection Prevalence in Homeless Shelters — Four U.S. Cities, March 27–April 15, 2020. *MMWR*  
195 *Morb Mortal Wkly Rep.* 2020 May 1;69(17):521–522.
- 196 6. Baggett TP, Keyes H, Sporn N, Gaeta JM. Prevalence of SARS-CoV-2 Infection in Residents of a Large  
197 Homeless Shelter in Boston. *JAMA.* 2020 Apr 27;323(21):2191–2192.
- 198 7. Wallace M, Hagan L, Curran KG, Williams SP, Handanagic S, Bjork A, et al. COVID-19 in Correctional  
199 and Detention Facilities — United States, February–April 2020; *MMWR Morb Mortal Wkly Rep.* 2020  
200 May 15;69(19):587–590.
- 201 8. Njuguna H, Wallace M, Simonson S, Tobolowsky FA, James AE, Bordelon K. Serial Laboratory Testing  
202 for SARS-CoV-2 Infection Among Incarcerated and Detained Persons in a Correctional and Detention  
203 Facility — Louisiana, April–May 2020. *MMWR Morb Mortal Wkly Rep.* 2020 July 3;69(26):836–840.
- 204 9. Dyal JW, Grant MP, Broadwater K, Bjork A, Waltenburg MA, Gibbins JD, et al. COVID-19 Among  
205 Workers in Meat and Poultry Processing Facilities — 19 States, April 2020. *MMWR Morb Mortal*  
206 *Wkly Rep.* 2020 May 8;69(18):557–561.
- 207 10. Delamater PL, Street EJ, Leslie TF, Yang Y, Jacobsen KH. Complexity of the Basic Reproduction  
208 Number (R0). *Emerg Infect Dis.* 2019;25(1):1-4. <https://dx.doi.org/10.3201/eid2501.171901>
- 209 11. He X, Lau EHY, Wu P, Deng X, Wang J, Hao X, et al. Temporal dynamics in viral shedding and  
210 transmissibility of COVID-19. *Nat Med.* 2020 Apr 15;26:672–675.
- 211 12. Centers for Disease Control and Prevention. COVID-19 Pandemic Planning Scenarios. 2020. Accessed  
212 July 13, 2020. Available at: [https://www.cdc.gov/coronavirus/2019-ncov/hcp/planning-](https://www.cdc.gov/coronavirus/2019-ncov/hcp/planning-scenarios.html)  
213 [scenarios.html](https://www.cdc.gov/coronavirus/2019-ncov/hcp/planning-scenarios.html).
- 214 13. Zhao J, Yuan Q, Wang H, et al. Antibody responses to SARS-CoV-2 in patients of novel coronavirus  
215 disease 2019 [published online ahead of print, 2020 Mar 28]. *Clin Infect Dis.* 2020;ciaa344.  
216 doi:10.1093/cid/ciaa344

- 217 14. Paltiel AD, Zheng A, Walensky RP. Assessment of SARS-CoV-2 Screening Strategies to Permit the Safe  
218 Reopening of College Campuses in the United States. *JAMA Netw Open*. 2020;3(7):e2016818.  
219 doi:10.1001/jamanetworkopen.2020.16818

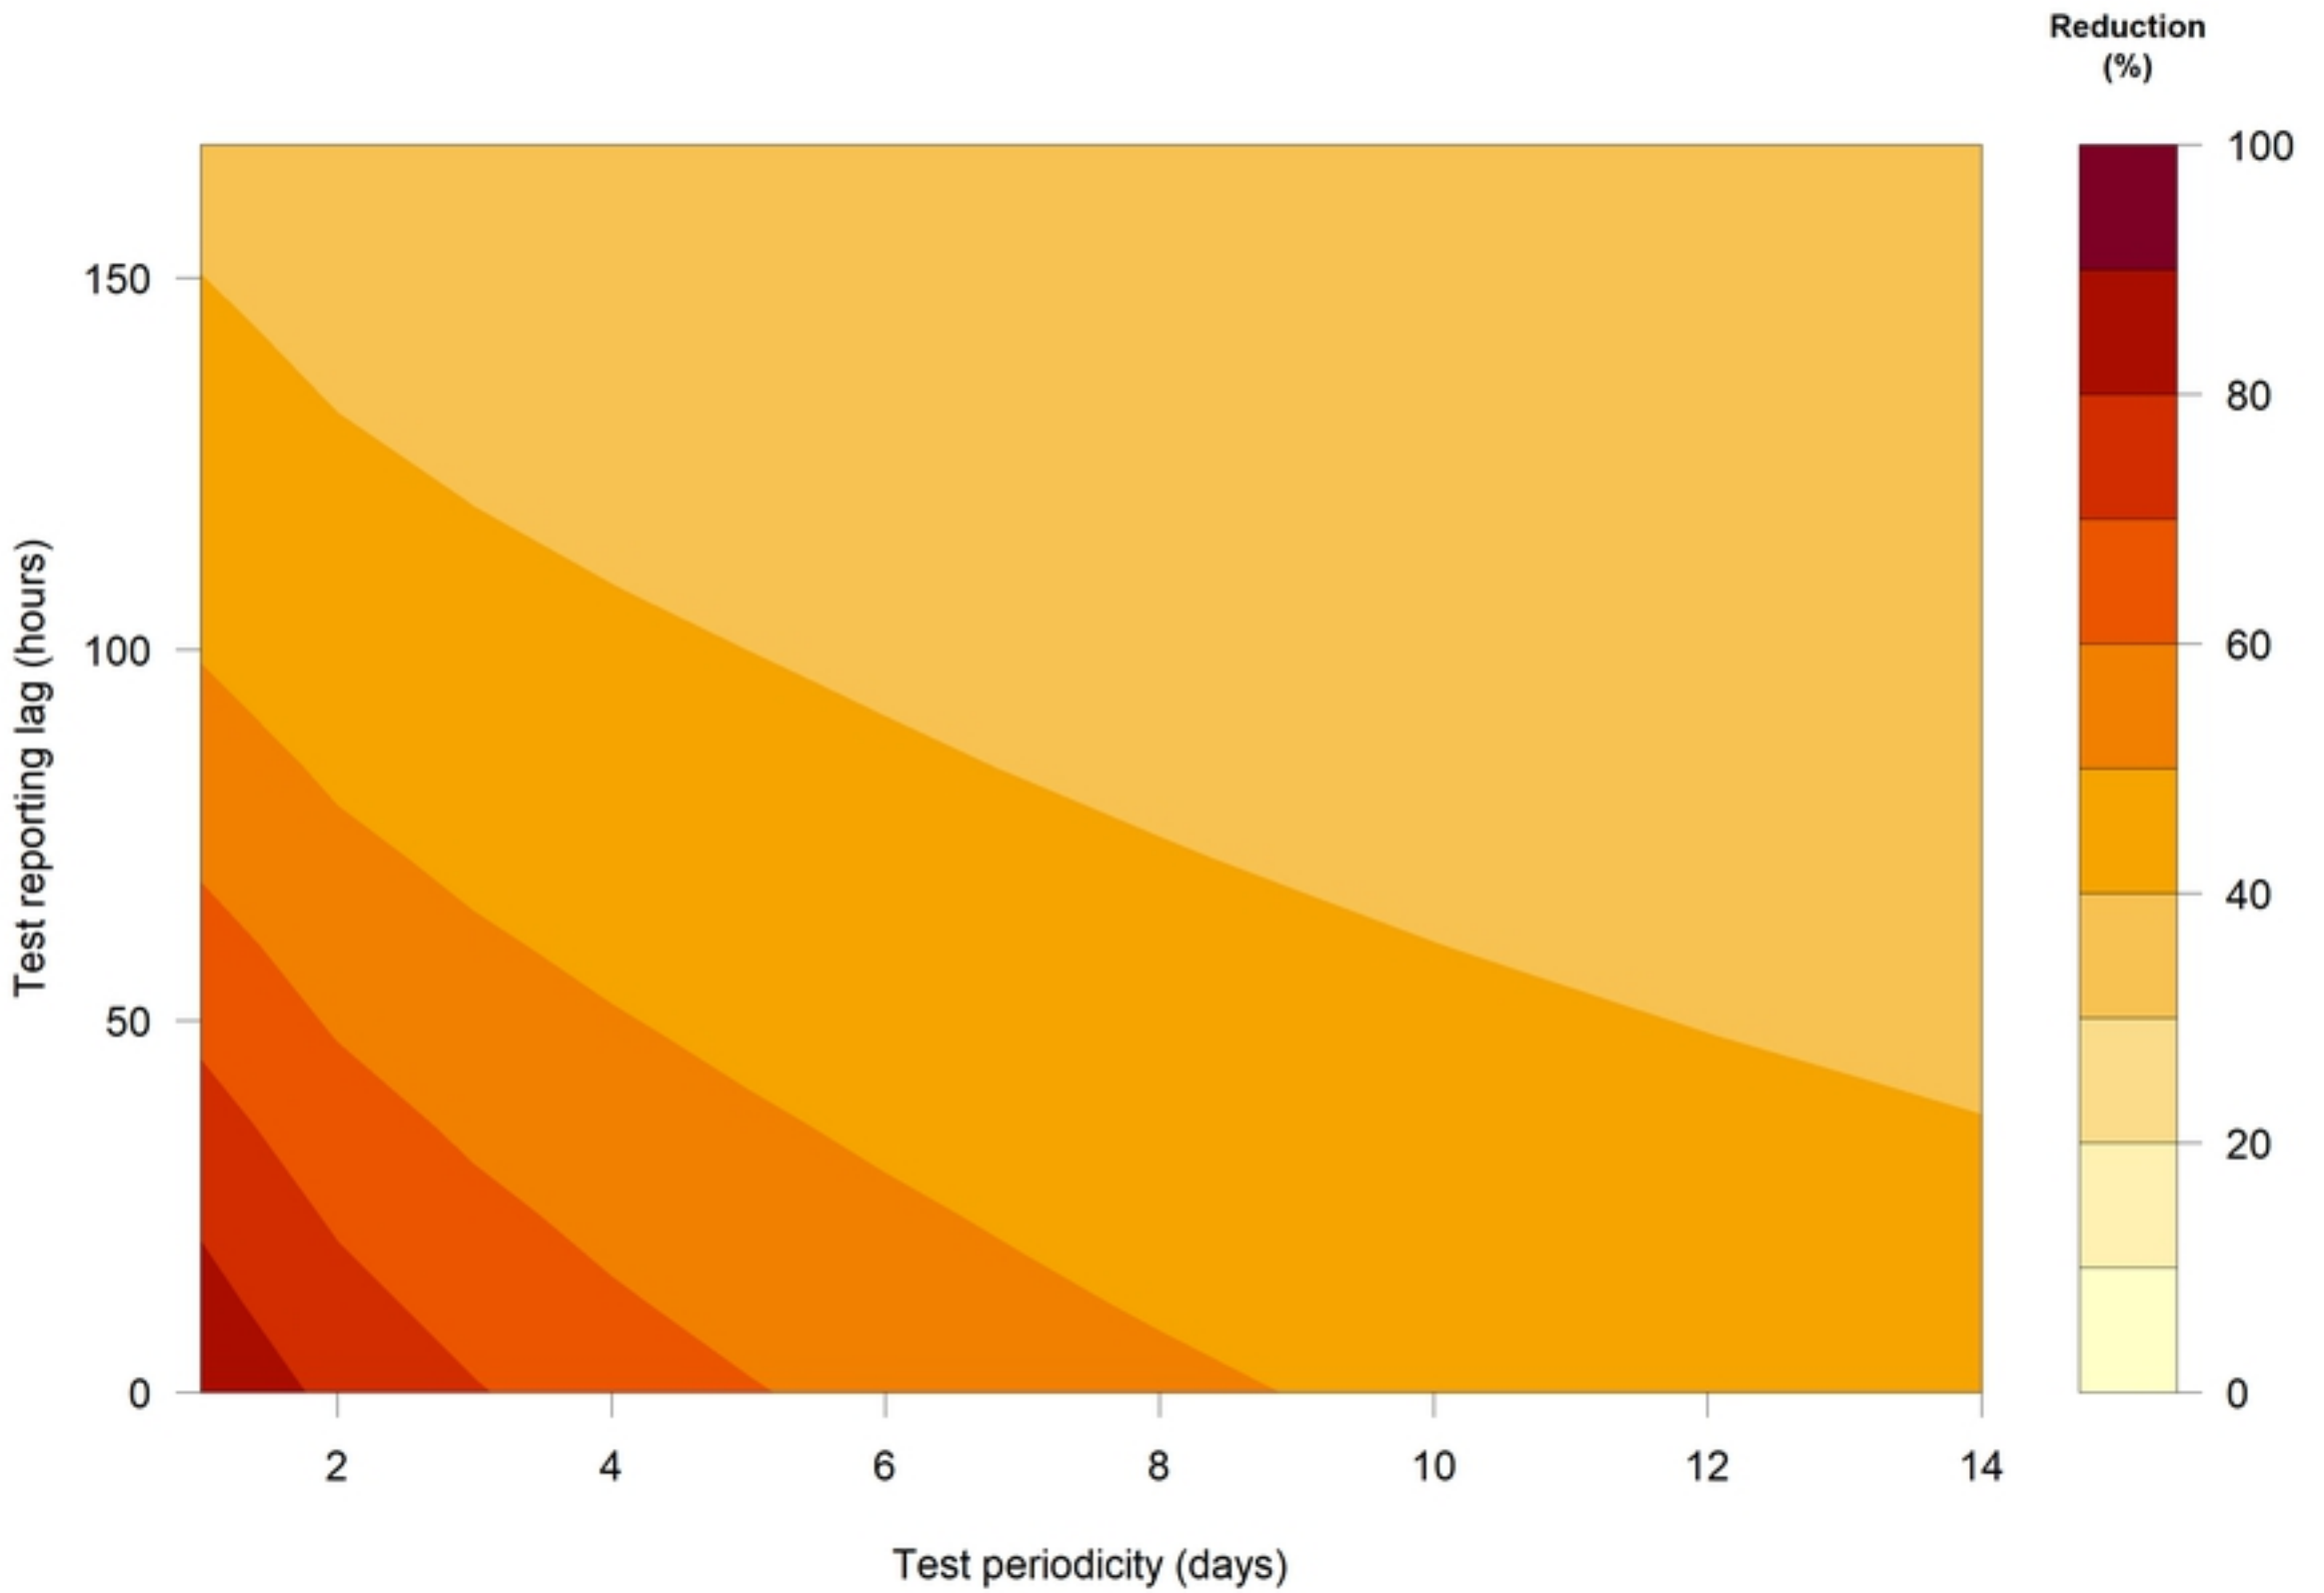

Figure

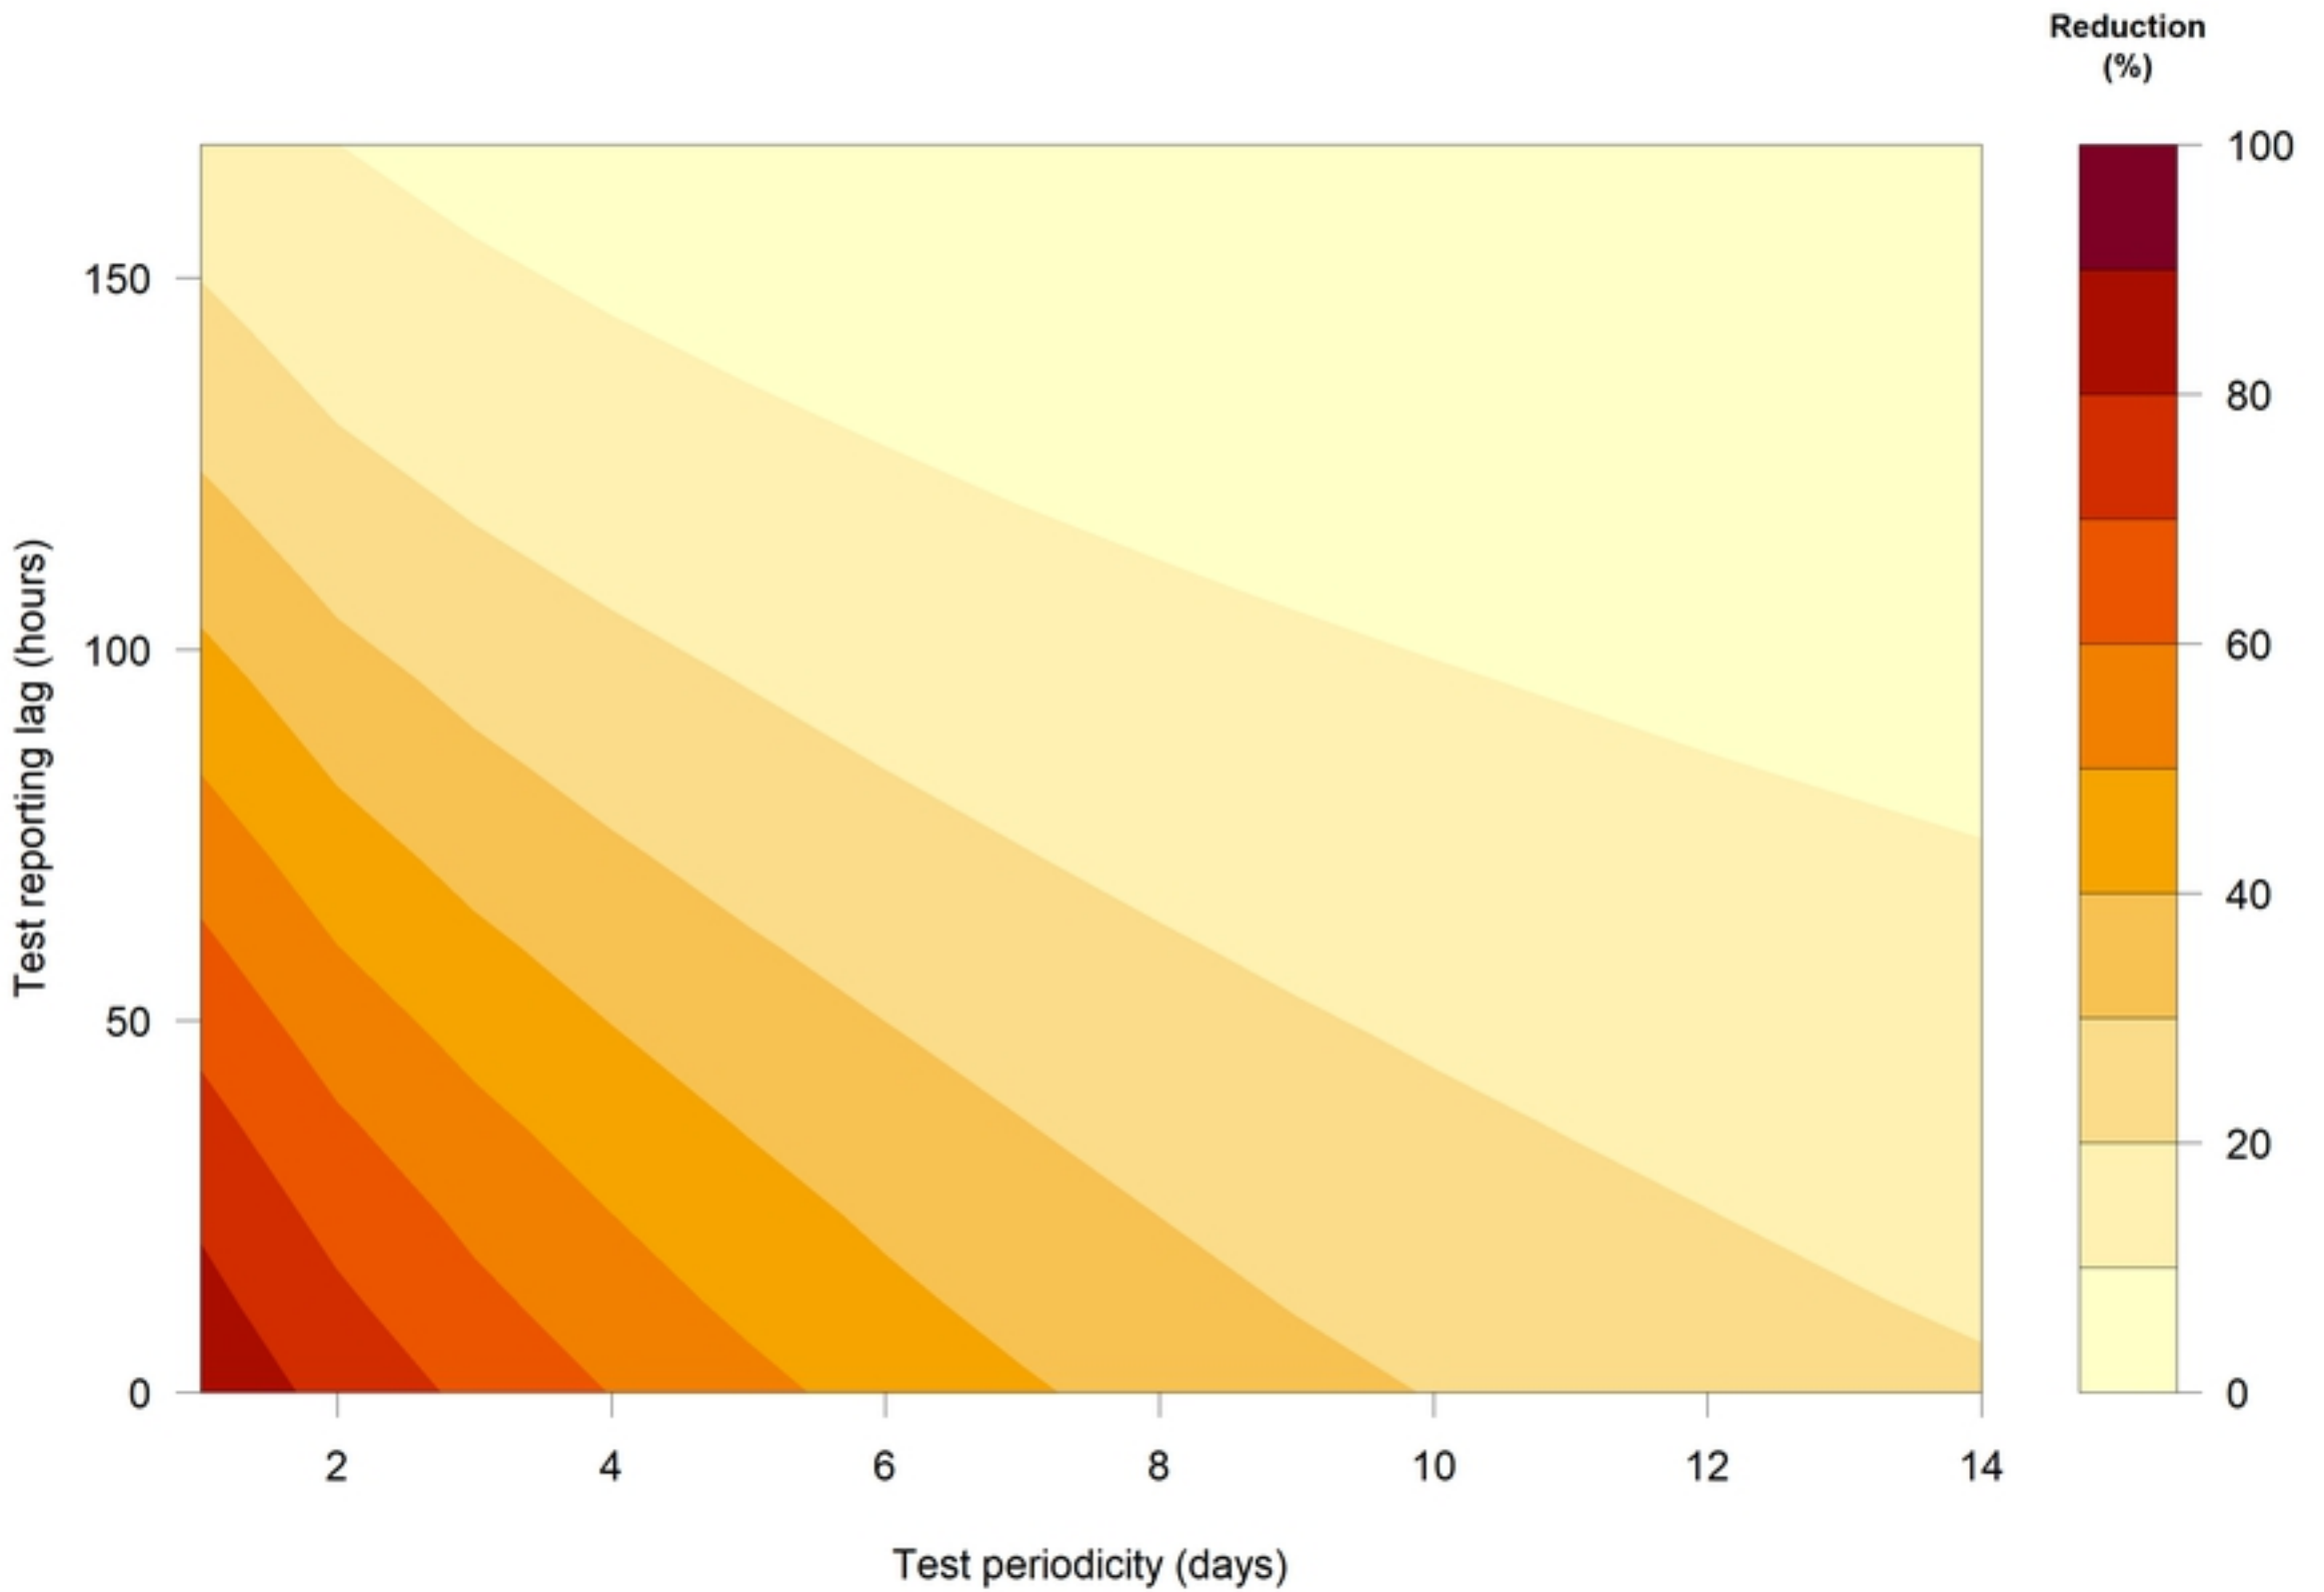

Figure
